# Supplementary material for: On the effect of COVID-19 pandemic in the excess of human mortality. The case of Brazil and Spain
Source: PubMed Central journal article supplement (PMC8412318; doi:10.1371/journal.pone.0255909), 2021-09-02
Supplement: pone.0255909.s001.pdf [file pone.0255909.s001.pdf]

Table 1: Number of total deaths by all causes in Brazil from 2015 to April 2021.

|      | Jan    | Feb    | Mar    | Apr    | May    | Jun    | Jul    | Aug    | Sep    | Oct    | Nov    | Dec    |
|------|--------|--------|--------|--------|--------|--------|--------|--------|--------|--------|--------|--------|
| 2015 | 104045 | 87956  | 99836  | 102191 | 111355 | 106899 | 110469 | 104752 | 100332 | 101913 | 98019  | 103633 |
| 2016 | 102884 | 99931  | 108711 | 109295 | 112709 | 114202 | 115376 | 108070 | 100379 | 104579 | 96607  | 101907 |
| 2017 | 102883 | 94061  | 105762 | 104145 | 111944 | 111401 | 119851 | 112116 | 104895 | 106524 | 99215  | 104782 |
| 2018 | 104098 | 91992  | 106467 | 105236 | 112180 | 114413 | 117129 | 112573 | 106568 | 104866 | 100527 | 107447 |
| 2019 | 107740 | 95468  | 107161 | 107595 | 115952 | 116373 | 122306 | 116104 | 109720 | 108788 | 102754 | 107331 |
| 2020 | 111500 | 93416  | 107096 | 114689 | 132304 | 135600 | 139826 | 131835 | 125725 | 121981 | 113942 | 129134 |
| 2021 | 134460 | 123530 | 186432 | 184095 |        |        |        |        |        |        |        |        |

Source: 01–2015 to 12–2019 (IBGE) and 01–2020 to 04–2021 (CNIRC) (at the time of writing this manuscript).

Table 2: Number of total deaths by all causes in Spain form 2015 to April 2021.

|      | Jan   | Feb   | Mar   | Apr   | May   | Jun   | Jul   | Aug   | Sep   | Oct   | Nov   | Dec   |
|------|-------|-------|-------|-------|-------|-------|-------|-------|-------|-------|-------|-------|
| 2015 | 47269 | 42464 | 38987 | 33686 | 32706 | 31078 | 35628 | 31220 | 28863 | 31898 | 32346 | 36423 |
| 2016 | 38334 | 35548 | 38198 | 33707 | 33001 | 31512 | 32961 | 32248 | 30095 | 32060 | 33759 | 39188 |
| 2017 | 49370 | 37434 | 35779 | 33208 | 33673 | 32236 | 31924 | 32356 | 30049 | 32680 | 34149 | 41665 |
| 2018 | 47911 | 39756 | 39772 | 34956 | 33421 | 31970 | 32215 | 33177 | 30293 | 32879 | 34338 | 37033 |
| 2019 | 44596 | 37711 | 37041 | 34181 | 33853 | 31858 | 33528 | 31633 | 29875 | 32672 | 34623 | 36054 |
| 2020 | 40699 | 34586 | 54498 | 56426 | 33184 | 29105 | 32799 | 34038 | 32802 | 37760 | 40276 | 39831 |
| 2021 | 49737 | 38666 | 35095 | 33147 |       |       |       |       |       |       |       |       |

Source: 01–2015 to 12–2019 (INE) and 01–2020 to 04–2021 (MoMo) (at the time of writing this manuscript).
