# Supplementary material for: On the effect of COVID-19 pandemic in the excess of human mortality. The case of Brazil and Spain
Source: PubMed Central journal article supplement (PMC8412318; doi:10.1371/journal.pone.0255909), 2021-09-02
Supplement: pone.0255909.s002.pdf [file pone.0255909.s002.pdf]

Table 1: Forecast from the ARIMA model for Brazil.

|          | Point.Forecast | Lower 80% | Lower 95% | Upper 80% | Upper 95% |
|----------|----------------|-----------|-----------|-----------|-----------|
| 2020 Jan | 107513         | 104191    | 102432    | 110836    | 112594    |
| 2020 Feb | 95544          | 91844     | 89885     | 99243     | 101202    |
| 2020 Mar | 108877         | 105092    | 103089    | 112661    | 114665    |
| 2020 Apr | 108441         | 104636    | 102622    | 112246    | 114260    |
| 2020 May | 116042         | 112233    | 110216    | 119852    | 121869    |
| 2020 Jun | 117477         | 113666    | 111649    | 121287    | 123305    |
| 2020 Jul | 121638         | 117827    | 115809    | 125449    | 127467    |
| 2020 Aug | 116348         | 112537    | 110520    | 120159    | 122177    |
| 2020 Sep | 110175         | 106364    | 104347    | 113986    | 116004    |
| 2020 Oct | 108819         | 105007    | 102990    | 112630    | 114647    |
| 2020 Nov | 103721         | 99910     | 97893     | 107533    | 109550    |
| 2020 Dec | 109593         | 105782    | 103765    | 113404    | 115422    |
| 2021 Jan | 109837         | 105746    | 103580    | 113928    | 116094    |
| 2021 Feb | 97700          | 93545     | 91345     | 101856    | 104055    |
| 2021 Mar | 110127         | 105956    | 103748    | 114298    | 116506    |
| 2021 Apr | 110172         | 105998    | 103788    | 114346    | 116556    |

Table 2: Forecast from the ARIMA model for Spain.

|          | Point.Forecast | Lower 80% | Lower 95% | Upper 80% | Upper 95% |
|----------|----------------|-----------|-----------|-----------|-----------|
| 2020 Jan | 44591          | 41887     | 40456     | 47294     | 48725     |
| 2020 Feb | 37894          | 34865     | 33261     | 40923     | 42527     |
| 2020 Mar | 37987          | 34880     | 33235     | 41094     | 42739     |
| 2020 Apr | 34355          | 31228     | 29573     | 37481     | 39137     |
| 2020 May | 33526          | 30395     | 28737     | 36658     | 38316     |
| 2020 Jun | 31859          | 28726     | 27068     | 34992     | 36650     |
| 2020 Jul | 32840          | 29706     | 28048     | 35973     | 37632     |
| 2020 Aug | 32395          | 29262     | 27603     | 35529     | 37188     |
| 2020 Sep | 30078          | 26945     | 25286     | 33211     | 34870     |
| 2020 Oct | 32772          | 29639     | 27980     | 35906     | 37565     |
| 2020 Nov | 34478          | 31344     | 29686     | 37611     | 39270     |
| 2020 Dec | 36545          | 33412     | 31753     | 39679     | 41338     |
| 2021 Jan | 44593          | 41183     | 39378     | 48002     | 49807     |
| 2021 Feb | 37802          | 34325     | 32485     | 41278     | 43119     |
| 2021 Mar | 37511          | 34017     | 32168     | 41005     | 42854     |
| 2021 Apr | 34267          | 30769     | 28918     | 37765     | 39617     |
